# Supplementary material
Source: MDPI journal article supplement (https://www.mdpi.com/2072-4292/13/6/1212)
Supplement: s1 [file s1]

# A new method for extracting individual plant bio-characteristics from high-resolution digital images

Saba Rabab<sup>1,2,\*</sup>, Edmond Breen<sup>2</sup>, Alem Gebremedhin<sup>3</sup>, Fan Shi<sup>2</sup>, Pieter Badenhorst<sup>4</sup>, Yi-Ping Phoebe Chen<sup>5</sup> and Hans D. Daetwyler<sup>1,2</sup>

<sup>1</sup> School of Applied Systems Biology, La Trobe University, Bundoora, Australia

<sup>2</sup> Agriculture Victoria, AgriBio, Centre for AgriBioscience, Bundoora, Australia.

<sup>3</sup> Agriculture Victoria, Grain Innovation Park, Horsham, Australia.

<sup>4</sup> Agriculture Victoria, Hamilton Centre, Hamilton, Australia.

<sup>5</sup> Department of Computer Science and Information Technology, La Trobe University, Bundoora, Australia.

\* Corresponding Author, Email: saba.rabab@agriculture.vic.gov.au

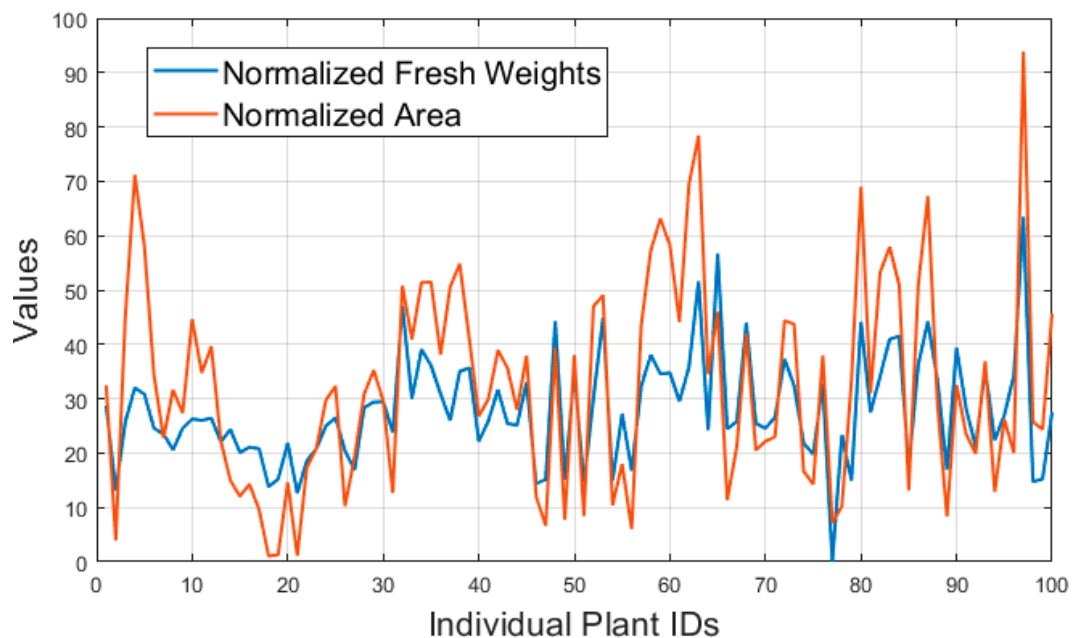

**Supp. Fig. 1.** Comparisons between the individual plant values of normalized values of fresh weights and areas for first 100 plants in a same range of [0, 100] for the field trial image taken on 9<sup>th</sup> May 2017.

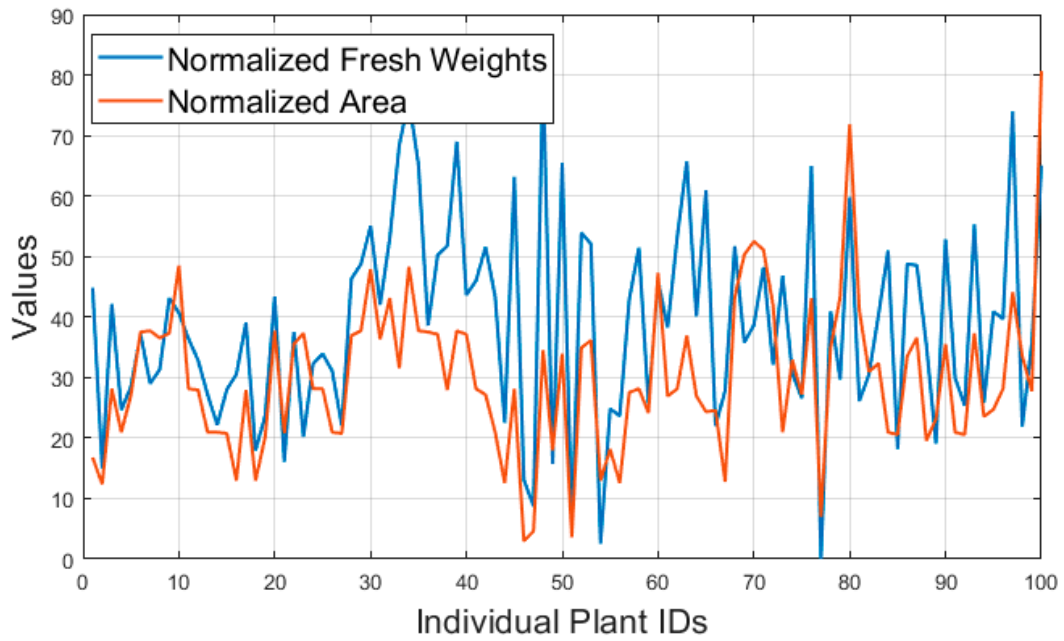

**Supp. Fig. 2.** Comparisons between the individual plant values of normalized values of fresh weights and areas for first 100 plants in a same range of [0, 100] for the field trial image taken on 11<sup>th</sup> September 2017.

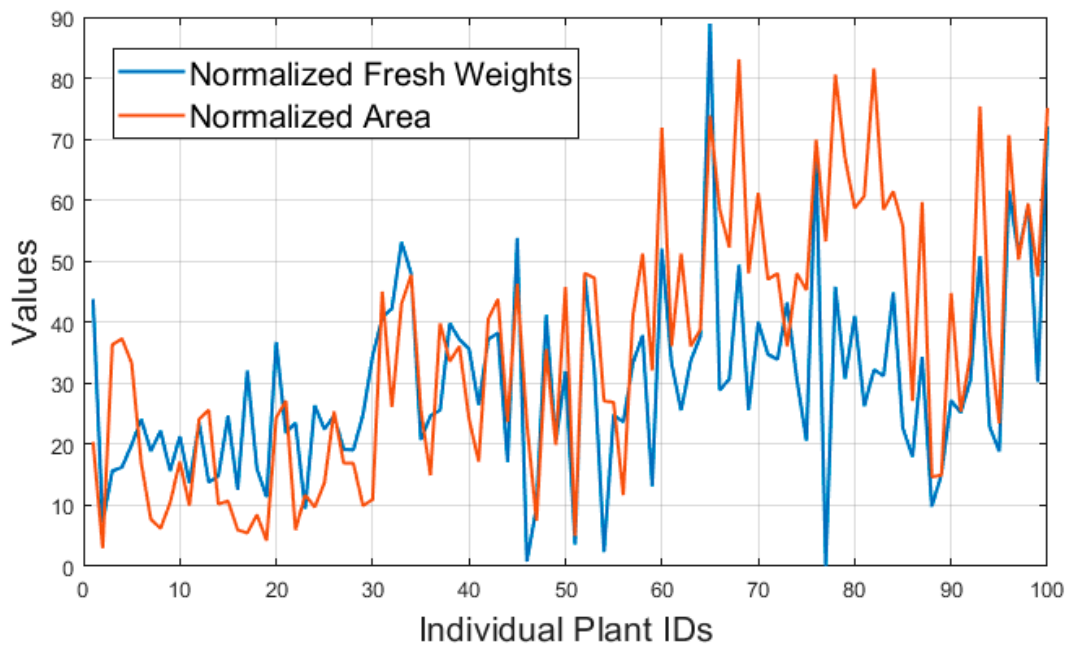

**Supp. Fig. 3.** Comparisons between the individual plant values of normalized values of fresh weights and areas for first 100 plants in a same range of [0, 100] for the field trial image taken on 20<sup>th</sup> November 2017.
